# Supplementary material for: Boosting C2H2/CO2separation of metal–organic frameworksviaanion exchange and temperature elevation
Source: Royal Society of Chemistry journal article supplement (doi:10.1039/d2ta04670a), 2022-01-01
Supplement: d2ta04670a1.pdf [file d2ta04670a1.pdf]

## Supplementary information

### **Boosting C<sub>2</sub>H<sub>2</sub>/CO<sub>2</sub> Separation of Metal-Organic Frameworks via Anion Exchange and Elevating Temperature**

Ting Wang,<sup>a#</sup> Wei Mei,<sup>b#</sup> Pengfei Li,<sup>a,c#</sup> Yun-Lei Peng,<sup>a</sup> Yao Chen,<sup>e</sup> Jian-Gong Ma,<sup>a</sup>

Peng Cheng,<sup>ad</sup> Ming Fang,<sup>c\*</sup> Kuang Yu,<sup>b\*</sup> Zhenjie Zhang<sup>ade\*</sup>

## Single Crystal X-ray diffraction structure analysis

Single crystal diffraction data of **NKMOF-2-BF<sub>4</sub>** were collected at 120 K under an Oxford Cryo stream system on a SuperNova (Mo) X-ray Source with micro-focus sealed X-ray tube. The structures were solved using the direct method and refined with the full-matrix least-squares technique using the 'XS' and 'XL' program package. Due to the presence of highly disordered guest molecules in the pore, “SQUEEZE” operation of Platon software was applied to all seven sets of crystal data. All nonhydrogen atoms were refined with anisotropic displacement parameters. The hydrogen atoms on the ligands were placed in idealized positions and refined using a riding model. Hydrogen in  $\mu_3$ -OH is added by hydrogenated manually, and the distance between hydrogen and oxygen and copper atoms are limited by DFIX instructions. The detailed crystallographic data and structure refinement parameters are summarized in Table S1 (CCDC: 1982349)

## Fitting of single-component adsorption isotherms

The single-component adsorption isotherms for C<sub>2</sub>H<sub>2</sub> and CO<sub>2</sub> in **NKMOF-2-Cl** and **NKMOF-2-BF<sub>4</sub>** were determined by fitting the adsorption isotherms at 298 K for the respective adsorbates to the dual-site Langmuir–Freundlich (DSLFF) equation,<sup>1</sup> The DSLF equation was given by:

$$q = q_{A,sat} \frac{b_A P^{n_A}}{1 + b_A P^{n_A}} + q_{B,sat} \frac{b_B P^{n_B}}{1 + b_B P^{n_B}}$$

where  $q$  is the uptake (in mmol g<sup>-1</sup>),  $P$  is the pressure (in kPa),  $q_{A,sat}$  and  $q_{B,sat}$  are the saturation uptakes (in mmol g<sup>-1</sup>) for sites 1 and 2,  $b_A$  and  $b_B$  are the affinity coefficients (in kPa<sup>-1</sup>) for sites 1 and 2, and  $n_A$  and  $n_B$  represent the deviations from the ideal homogeneous surface. The single-component adsorption isotherms for C<sub>2</sub>H<sub>2</sub> and CO<sub>2</sub> were fitted by the above form of DSLF equation.<sup>2</sup> The fitting parameters were displayed in **Table S6-7**.

### Isosteric Heat of Adsorption

A virial-type expression comprising the temperature-independent parameters  $a_i$  and  $b_j$  was employed to calculate the enthalpies of adsorption for CO<sub>2</sub> and C<sub>2</sub>H<sub>2</sub> (at 273 K and 298 K) on **NKMOF-2-Cl** and **NKMOF-2-BF<sub>4</sub>**. In each case, the data were fitted use equation:

$$\ln P = \ln N + \frac{1}{T} \sum_{i=0}^m a_i N^i + \sum_{j=0}^n b_j N^j$$

$$Q_{st} = -R \sum_{i=0}^m a_i N^i$$

Here,  $P$  is the pressure expressed in bar,  $N$  is the amount absorbed in mmol g<sup>-1</sup>,  $T$  is the temperature in K,  $a_i$  and  $b_j$  are virial coefficients, and  $m$ ,  $n$  represent the number of coefficients required to adequately describe the isotherms ( $m$  and  $n$  were gradually increased till the contribution of extra added  $a$  and  $b$  coefficients was deemed to be statistically insignificant towards the overall fit. And the average value of the squared deviations from the experimental values was minimized).

$Q_{st}$  is the coverage-dependent isosteric heat of adsorption and  $R$  is the universal gas

constant. The heat enthalpy of gas sorption for **NKMOF-2-Cl** and **NKMOF-2-BF<sub>4</sub>** in this manuscript are determined by using the sorption data measured in the pressure range from 0 - 1 bar (273 K and 298 K).

### **IAST selectivity calculation**

In order to compare the C<sub>2</sub>H<sub>2</sub>/CO<sub>2</sub> separation performance of various MOFs, IAST calculations of mixture adsorption were performed. For separation of a binary mixture of components A and B, the adsorption selectivity is defined by

$$S_{abs} = \frac{q_A/q_B}{y_A/y_B}$$

### **Calculation of the kinetic amount based on breakthrough curves**

The gas adsorption capacity during the breakthrough experiments was calculated by the following equations:<sup>3</sup>

$$q_i = \frac{C_i V}{m} \times \int_0^t \left(1 - \frac{F}{F_0}\right) dt$$

Where  $q_i$  is the equilibrium adsorption capacity of gas  $i$  (cm<sup>3</sup> g<sup>-1</sup>),  $C_i$  is the feed gas concentration,  $V$  is the volumetric feed flow rate (cm<sup>3</sup> min<sup>-1</sup>),  $t$  is the adsorption time (min),  $F_0$  and  $F$  are the inlet and outlet gas molar flow rates, respectively, and  $m$  is the mass of the adsorbent (g).

## Computational Details

All the Density Functional Theory (DFT) simulations were performed using the Vienna ab initio simulation package (VASP) in conjunction with the van der Waals (*vdw*) corrected optPBE-*vdW* functional and the projector augmented wave (PAW) method.<sup>4-8</sup> A Hubbard-type on-site U correction was applied on the Cu *d* states, with the U and J parameters setting to 8 and 1 eV, respectively.<sup>9</sup> The energy cutoff on the wave function was set to 400 eV. We used only the gamma point to sample the Brillouin Zone, which is a reasonable scheme for studying insulators with large unit cells. All the geometry optimizations were performed using a  $10^{-4}$  eV/atom energy threshold, and all forces were converged within 0.01 eV/Å.

Due to Pulay stress, **NKMOF-2** cannot be optimized directly as it will collapse into unphysical nonporous geometries. Therefore, we applied an artificial anisotropic internal stress to counterbalance the artifacts caused by Pulay stress. We gradually increase the magnitude of the artificial internal stress, so the box volume expands correspondingly. The optimal box dimensions and geometry were obtained when the lattice energy (without the artificial PV term) reaches its minimum. The lattice energy change with respect to the internal stress are shown in **Fig. S18**. The internal stress corresponding to the minimal energy of **NKMOF-2-Cl** and **NKMOF-2-BF<sub>4</sub>** was 20 and 27.5 kbar, respectively. Both the obtained structures of **NKMOF-2-Cl** and **NKMOF-2-BF<sub>4</sub>** corresponding to the minimum energy are in excellent agreement with

the experimental results.

Density functional theory (DFT) calculations are performed to understand the reasons for the increased loading of **NKMOF-2-BF<sub>4</sub>**, as well as its adsorption selectivity. We first optimize the structures of empty **NKMOF-2-Cl** and **NKMOF-2-BF<sub>4</sub>** without guest molecules. By exerting additional isotropic stress, we remove the pulay stress artifacts and obtain the optimal geometry of empty **NKMOF-2-Cl** and **NKMOF-2-BF<sub>4</sub>** (see SI for details). The resulted lattice parameters are listed in **Table S8**, in comparison with the experimental data. Excellent agreement between experiment and calculation is achieved, with deviations smaller than 3.1% for **NKMOF-2-Cl** and 1.8% for **NKMOF-2-BF<sub>4</sub>**, validating our calculation methods.

To further verified that we did not under sample **NKMOF-2-Cl**, we transfer the CO<sub>2</sub> geometries of all four sites in **NKMOF-2-BF<sub>4</sub>** into the **NKMOF-2-Cl** frame, fixing their relative orientations for the Cu-O skeleton. Then we reoptimize and compute the resulted adsorption energies, and compare them with their counterparts in **NKMOF-2-BF<sub>4</sub>**. The results are shown in **Table S9**, only site I remains low energy in **NKMOF-2-Cl**, while all other three sites become much less stable. Therefore, **NKMOF-2-BF<sub>4</sub>** does possess much more low-energy sites compare to **NKMOF-2-Cl**, validating our conclusion.

Starting from the optimal structure, we insert CO<sub>2</sub> molecule randomly into the **NKMOF-2-Cl** and **NKMOF-2-BF<sub>4</sub>**, keeping the distance between the CO<sub>2</sub> and the framework atoms larger than 2.5Å. We sample 20 different initial geometries for CO<sub>2</sub> in **NKMOF-2-Cl** and **NKMOF-2-BF<sub>4</sub>**, respectively. After the guest molecule is

inserted, we fix the lattice parameters and only optimize the atom positions. Meanwhile, the energy of a single CO<sub>2</sub> is computed using an empty box with the same dimension as the optimized **NKMOF-2**.

The interaction energy between CO<sub>2</sub>, anion (BF<sub>4</sub><sup>-</sup> or Cl<sup>-</sup>) and frame walls can be decomposed using many-body decomposition:

$$\Delta E_{adsorption} = \Delta E_{deform}^{NKMOF-2} + \Delta E_{deform}^{CO_2} + \Delta E_{binding}^{CO_2 + Anion} + \Delta E_{binding}^{CO_2 + Frame\ wall} + \Delta E_{3-body\ interactions}$$

where  $\Delta E_{deform}^{AF}$  is the deformation energy of the empty **NKMOF-2** before and after adsorption,  $\Delta E_{deform}^{CO_2}$  is the deformation energy of CO<sub>2</sub> before and after adsorption,  $\Delta E_{binding}^{CO_2 + Anion}$  and  $\Delta E_{binding}^{CO_2 + Frame\ wall}$  are the binding energy of CO<sub>2</sub> and anions and CO<sub>2</sub> and the frame wall,  $\Delta E_{3-body\ interactions}$  is the 3-body interaction. The energy decomposition results are shown in **Table S5**.

**Table S1** Crystal data and refinement summary

| Complex                              | <b>NKMOF-2-BF<sub>4</sub></b>                                                                                 |
|--------------------------------------|---------------------------------------------------------------------------------------------------------------|
| Formula                              | C <sub>18</sub> H <sub>12</sub> BCl <sub>2</sub> Cu <sub>4</sub> F <sub>4</sub> N <sub>6</sub> O <sub>6</sub> |
| Formula weight                       | 820.21                                                                                                        |
| Crystal system                       | monoclinic                                                                                                    |
| Space group                          | Cc                                                                                                            |
| a (Å)                                | 13.2703(4)                                                                                                    |
| b (Å)                                | 25.7082(7)                                                                                                    |
| c (Å)                                | 9.7839(9)                                                                                                     |
| $\beta$ (°)                          | 92.398(6)                                                                                                     |
| $V$ (Å) <sup>3</sup>                 | 3334.9(3)                                                                                                     |
| Z                                    | 4                                                                                                             |
| D <sub>c</sub> (g/cm <sup>3</sup> )  | 1.634                                                                                                         |
| $R_{\text{int}}$                     | 5.96%                                                                                                         |
| $R_1$ [ $I > 2\sigma(I)$ ]           | 6.97%                                                                                                         |
| wR <sub>2</sub> [ $I > 2\sigma(I)$ ] | 18.46%                                                                                                        |
| GOOF                                 | 0.978                                                                                                         |
| CCDC                                 | 1982349                                                                                                       |



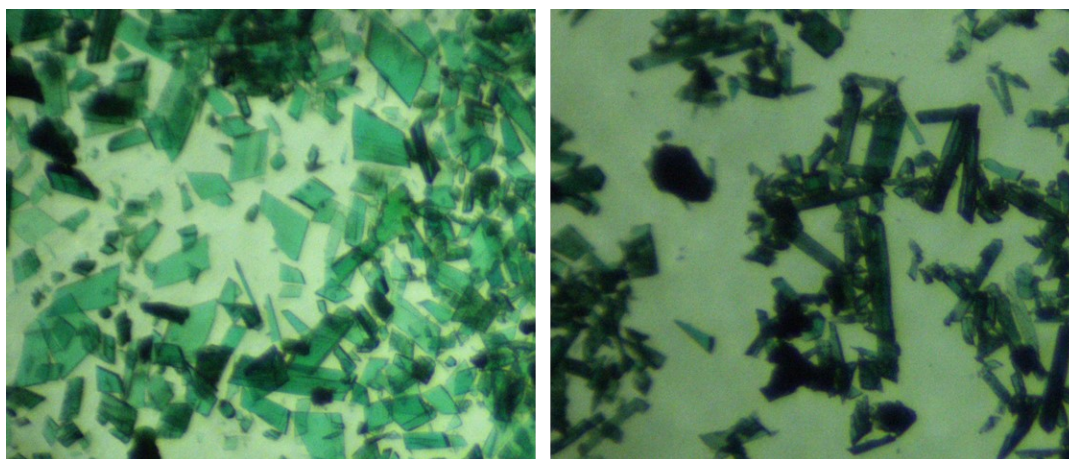

**Fig. S1** Crystal Photographs of NKMOF-2-Cl (left) and NKMOF-2-BF<sub>4</sub> (right).

**Table S2** Use ion chromatography to determine the content of F and Cl in NKMOF-2-BF<sub>4</sub>.

| Sample         | F content (wt %) | Cl content (wt %) |
|----------------|------------------|-------------------|
| As calculated  | 9.27             | 8.65              |
| As synthesized | 7.83             | 8.75              |

**Table S3** Use ion chromatography to determine the content of Cl in NKMOF-2-Cl.

| Sample         | Cl content (wt %) |
|----------------|-------------------|
| As calculated  | 13.83             |
| As synthesized | 11.87             |

**Table S4.** Inductively Coupled Plasma Optical Emission Spectrometer (ICP-OES) for

**NKMOF-2-BF<sub>4</sub>.**

| Sample         | Cu content (wt %) | B content (wt %) |
|----------------|-------------------|------------------|
| As-synthesized | 32.6%             | 1.10%            |
| Calculated     | 31.0%             | 1.21%            |

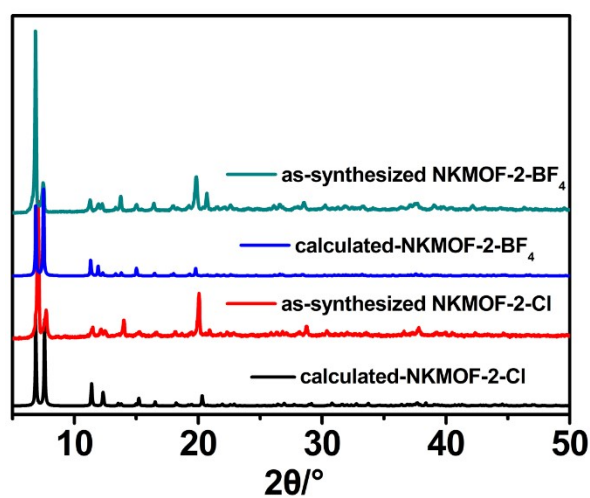

**Fig. S2** The powder X-ray diffraction patterns for NKMOF-2-Cl and NKMOF-2-BF<sub>4</sub>.

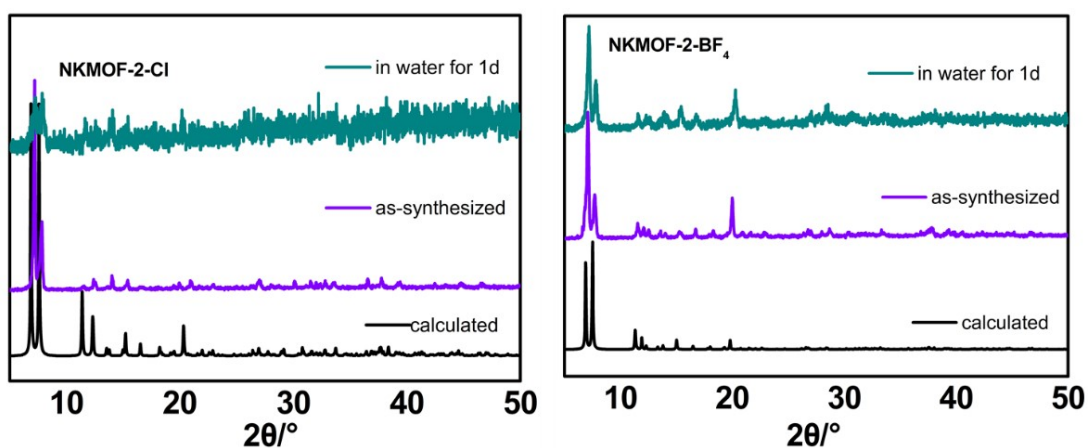

**Fig. S3.** PXRD patterns of NKMOF-2-Cl (left) and NKMOF-2-BF<sub>4</sub> (right) as-synthesized and soaked in water for 1 day.

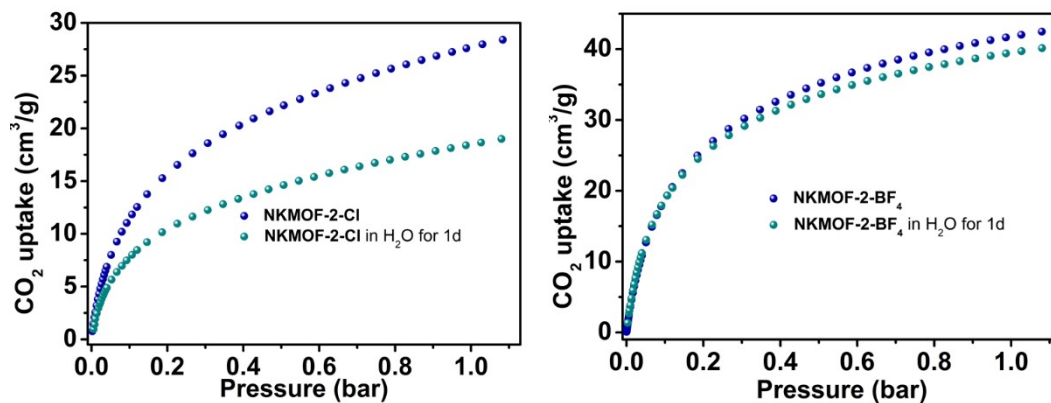

**Fig. S4** CO<sub>2</sub> adsorption of NKMOF-2-Cl (left) and NKMOF-2-BF<sub>4</sub> (right) at 298K.

As-synthesized (royal blue), soaking in water for 1day (dark cyan).

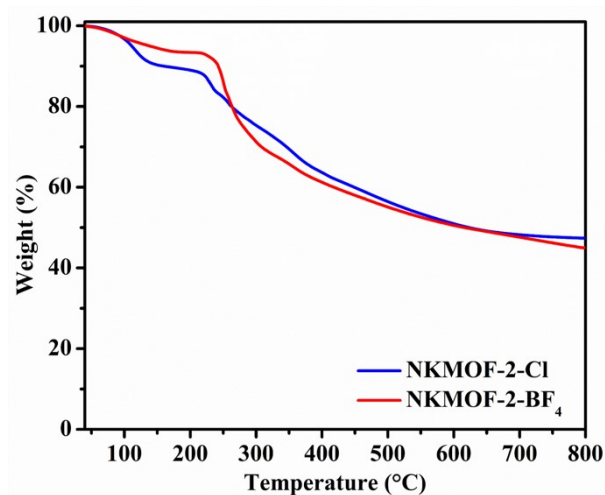

**Fig. S5** TGA curves for NKMOF-2-Cl and NKMOF-2-BF<sub>4</sub>.

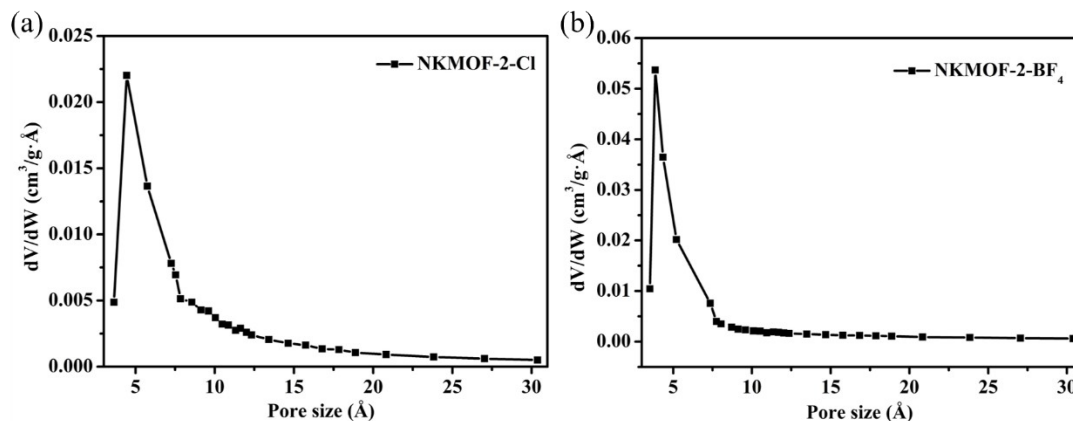

**Fig. S6** Pore size distribution calculated based on CO<sub>2</sub> adsorption isotherms at 195 K

for NKMOF-2-Cl (a) and NKMOF-2-BF<sub>4</sub> (b).

**Table S5** The energy decomposition of the interactions between the CO<sub>2</sub>, anion (BF<sub>4</sub><sup>-</sup> or Cl<sup>-</sup>), and frame walls, where AF represents Anion + Frame wall, C is CO<sub>2</sub>, and FC represents Frame wall + CO<sub>2</sub>. (Unit in kJ/mol)

|                     |     | NKMOF-2-BF <sub>4</sub> | NKMOF-2-Cl | Difference |
|---------------------|-----|-------------------------|------------|------------|
| Adsorption Energy   |     | -59.7                   | -50.3      | -9.4       |
| Deformed energy     | AF  | -1.2                    | 2.8        | -4.0       |
|                     | C   | 1.1                     | 0.8        | 0.3        |
| Binding energy      | AC  | 11.6                    | 16.8       | -5.2       |
|                     | FC  | -74.0                   | -60.5      | -13.5      |
|                     | AF* | 220.4                   | 241.2      | -20.8      |
| 3-body interactions |     | 2.8                     | -10.2      | 13.0       |

**Note:** The AF binding energies are positive due to the arbitrary definitions of charged reference states, thus the value itself has no realistic physical meanings and we should only focus on the changes due to the influence of different anions.

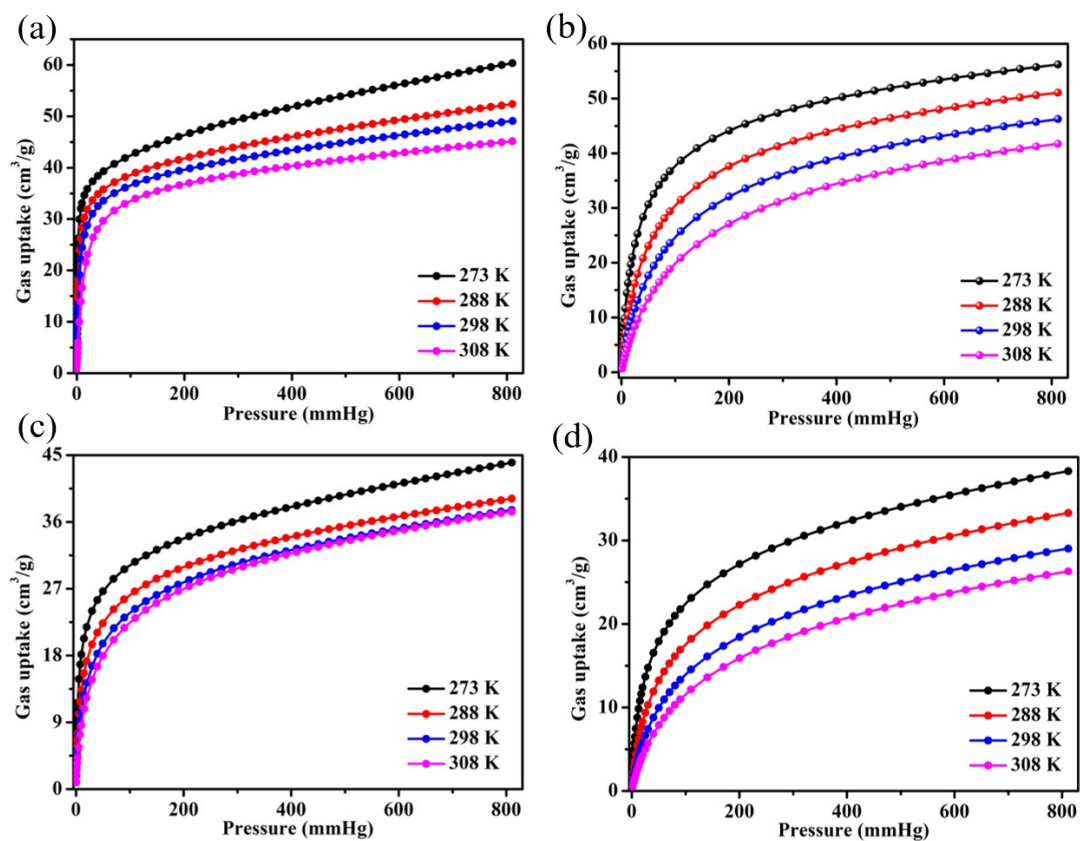

**Fig. S7** Single-component adsorption isotherm at different temperatures for NKMOF-2. (a)  $C_2H_2$  adsorption for NKMOF-2- $BF_4$ ; (b)  $CO_2$  adsorption for NKMOF-2- $BF_4$ ; (c)  $C_2H_2$  adsorption isotherms for NKMOF-2-Cl; (d)  $CO_2$  adsorption isotherms for NKMOF-2-Cl.

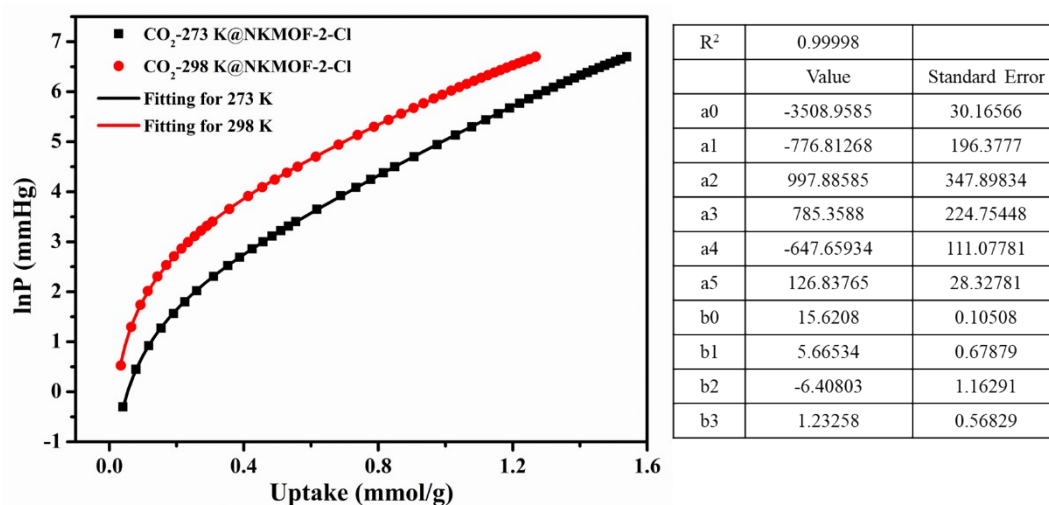

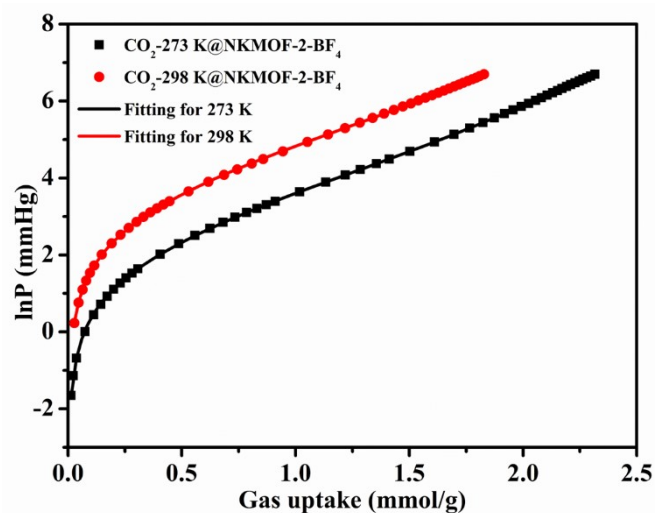

| R <sup>2</sup> | 0.99997     |                |
|----------------|-------------|----------------|
|                | Value       | Standard Error |
| a0             | -3955.45327 | 24.12285       |
| a1             | -469.70705  | 128.19228      |
| a2             | 872.34996   | 166.43096      |
| a3             | -586.6357   | 71.51717       |
| a4             | 178.13085   | 22.00368       |
| a5             | -28.63784   | 3.81801        |
| b0             | 17.08697    | 0.08494        |
| b1             | 2.09767     | 0.44868        |
| b2             | -1.72544    | 0.56982        |
| b3             | 0.75784     | 0.19844        |

Fig. S8 The virial fitting of CO<sub>2</sub> sorption data for NKMOF-2-Cl (top) and NKMOF-2-BF<sub>4</sub> (bottom).

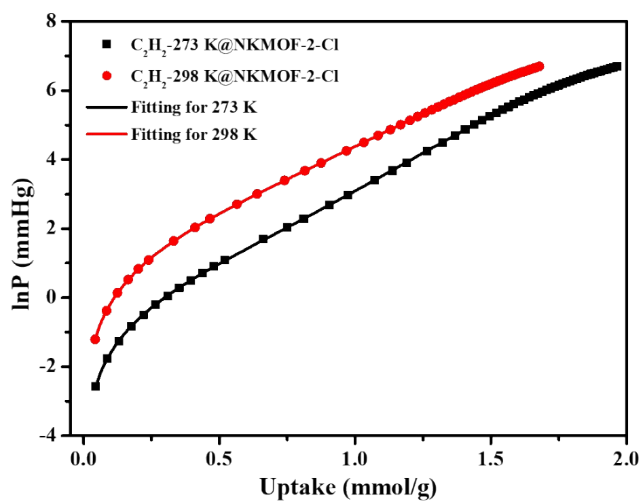

| R <sup>2</sup> | 0.99998     |                |
|----------------|-------------|----------------|
|                | Value       | Standard Error |
| a0             | -4593.94544 | 28.365         |
| a1             | -676.8184   | 141.53737      |
| a2             | 493.02586   | 179.52779      |
| a3             | 952.16721   | 86.91066       |
| a4             | -407.7971   | 39.85208       |
| a5             | 41.60479    | 7.88249        |
| b0             | 17.23858    | 0.0996         |
| b1             | 5.77132     | 0.50083        |
| b2             | -4.85933    | 0.63153        |
| b3             | 0.29772     | 0.22624        |

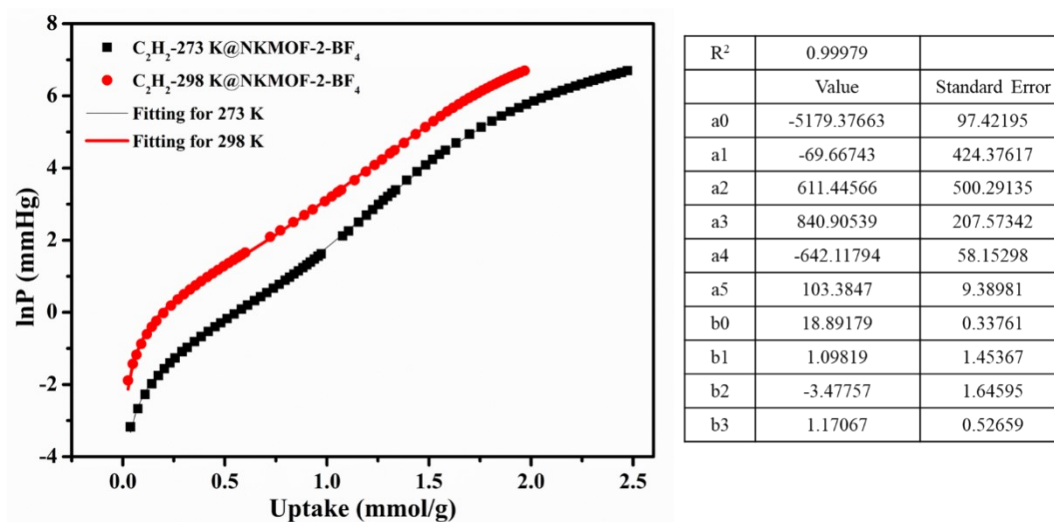

**Fig. S9** The virial fitting of  $C_2H_2$  sorption data for **NKMOF-2-Cl** (top) and **NKMOF-2-BF<sub>4</sub>** (bottom).

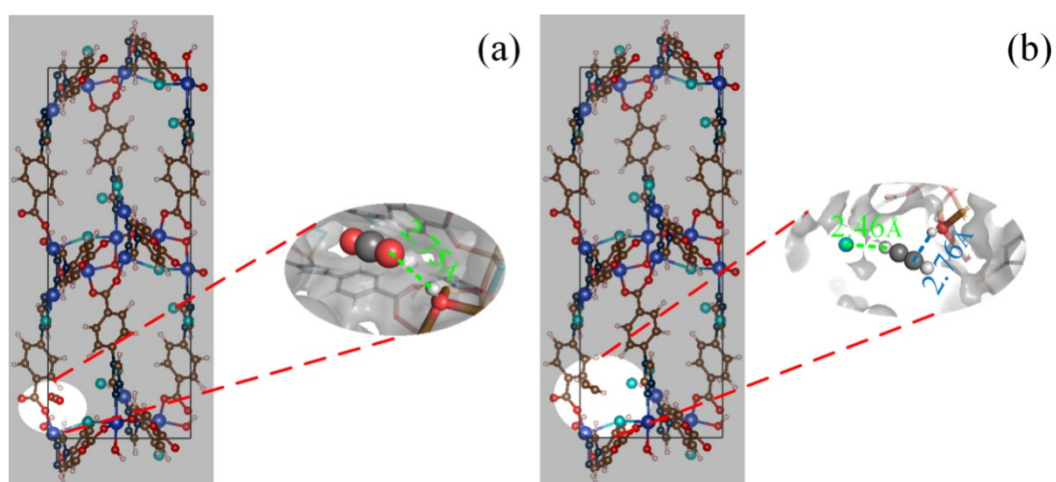

**Fig. S10** The primary adsorption sites in **NKMOF-2-Cl** for (a)  $CO_2$  and (b)  $C_2H_2$ .

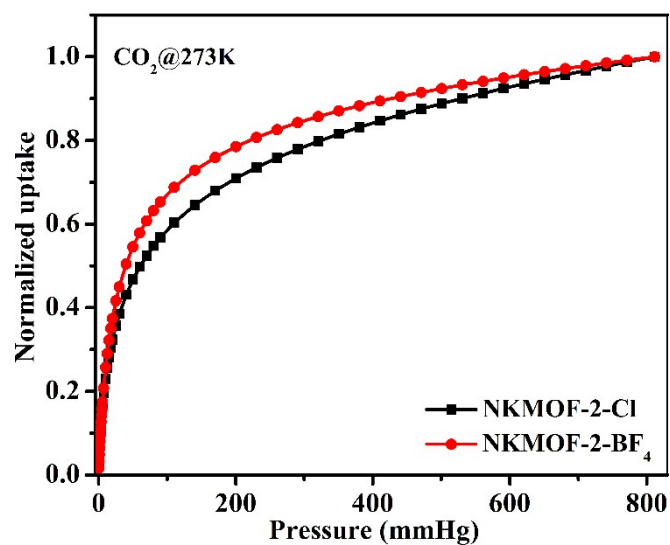

**Fig. S11** The normalized CO<sub>2</sub> adsorption isotherms for NKMOF-2-Cl and NKMOF-2-BF<sub>4</sub> at 273 K.

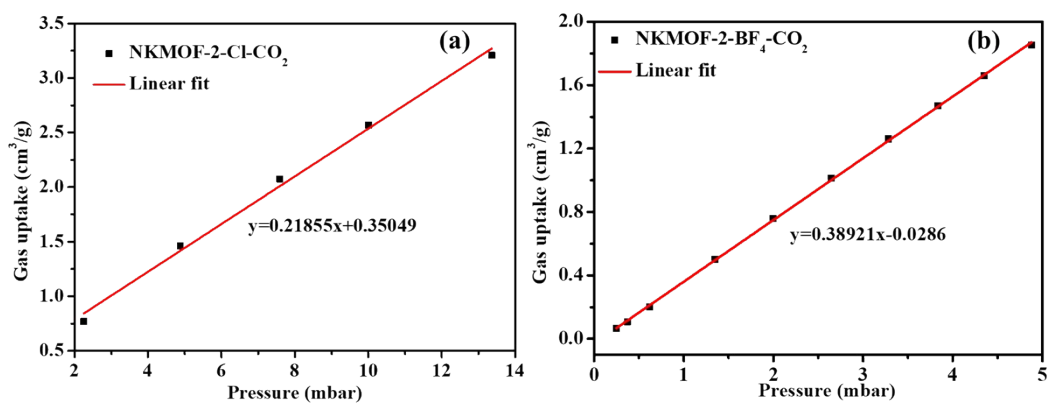

**Fig. S12** The linear part of the adsorption profile of CO<sub>2</sub> for NKMOF-2-Cl (a) and NKMOF-2-BF<sub>4</sub> (b) at 298 K



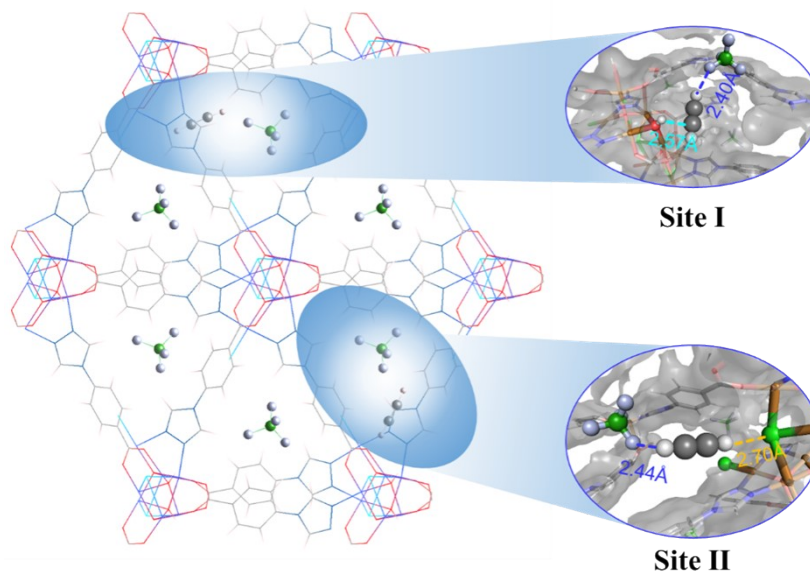

**Fig. S13** The primary adsorption sites in **NKMOF-2-BF<sub>4</sub>** for C<sub>2</sub>H<sub>2</sub>.

**Table S6** The fitted parameters for the DSLF equation for the CO<sub>2</sub> adsorption isotherms for **NKMOF-2-Cl** and **NKMOF-2-BF<sub>4</sub>** at 298 K.

| Parameter                                  | NKMOF-2-Cl | NKMOF-2-BF <sub>4</sub> |
|--------------------------------------------|------------|-------------------------|
| q <sub>A,sat</sub> (mmol g <sup>-1</sup> ) | 0.75041    | 1.51733                 |
| b <sub>A</sub> (kPa <sup>-1</sup> )        | 0.15996    | 0.14099                 |
| n <sub>A</sub>                             | 0.91138    | 0.92964                 |
| q <sub>B,sat</sub> (mmol g <sup>-1</sup> ) | 1.74498    | 1.52408                 |
| b <sub>B</sub> (kPa <sup>-1</sup> )        | 0.01132    | 0.01449                 |
| n <sub>B</sub>                             | 0.82134    | 0.85267                 |
| R <sup>2</sup>                             | 0.9999947  | 0.999995                |

**Table S7** The fitted parameters for the DSLF equation for the  $C_2H_2$  adsorption isotherms for **NKMOF-2-Cl** and **NKMOF-2-BF<sub>4</sub>** at 298 K.

| Parameter                           | NKMOF-2-Cl | NKMOF-2-BF <sub>4</sub> |
|-------------------------------------|------------|-------------------------|
| $q_{A,sat}$ (mmol g <sup>-1</sup> ) | 1.14857    | 1.53393                 |
| $b_A$ (kPa <sup>-1</sup> )          | 0.47049    | 1.64895                 |
| $n_A$                               | 0.76221    | 0.93486                 |
| $q_{B,sat}$ (mmol g <sup>-1</sup> ) | 5.39573    | 6.09                    |
| $b_B$ (kPa <sup>-1</sup> )          | 0.00665    | 0.00507                 |
| $n_B$                               | 0.62382    | 0.67927                 |
| $R^2$                               | 0.999983   | 0.999998                |

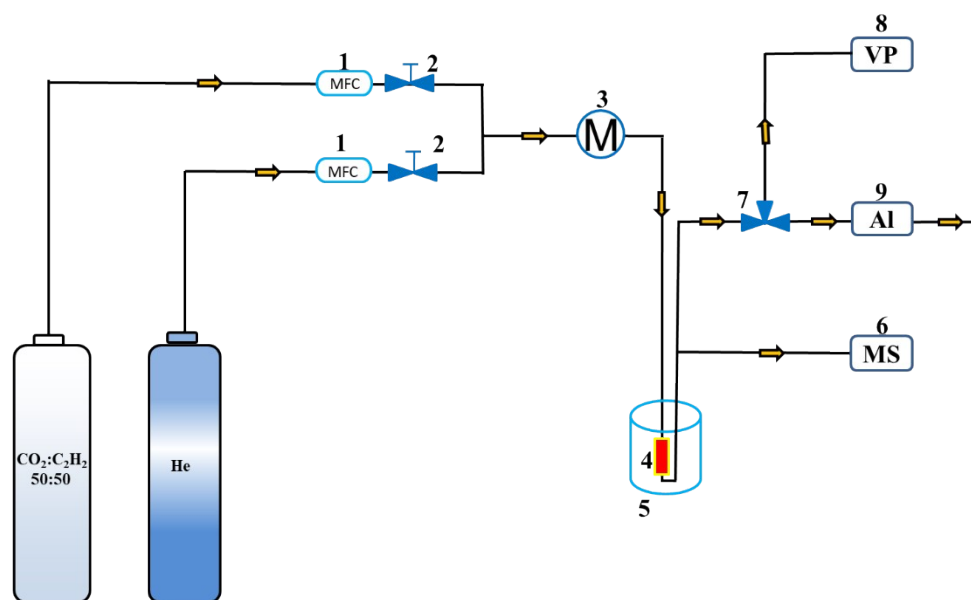

**Fig. S14** The schematic breakthrough tests device. (1. Mass flow controller 2. Valve 3. Mixed gas room 4. Colum 5. Mantle heater 6. Mass spectrum 7. 3-way valve 8. Vacuum pump 9. Anti-backfire valve)

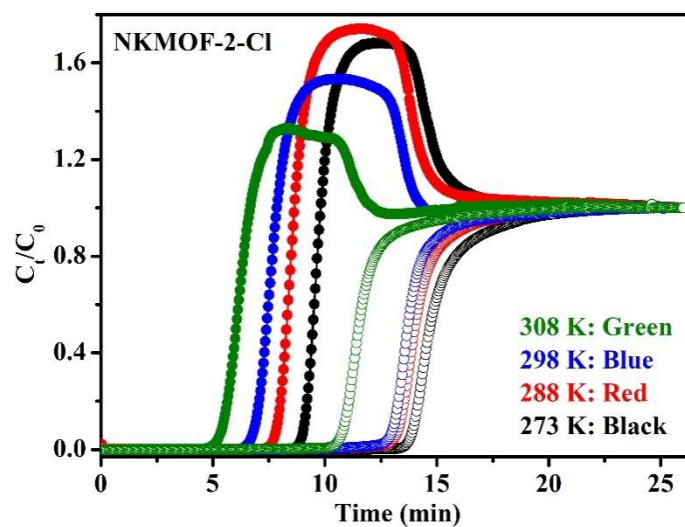

**Fig. S15** The breakthrough curves of  $C_2H_2/CO_2$  ( $v/v = 2/1$ ) with He as carrier gas for NKMOF-2-Cl at 273 K, 288 K, 298 K and 308 K.

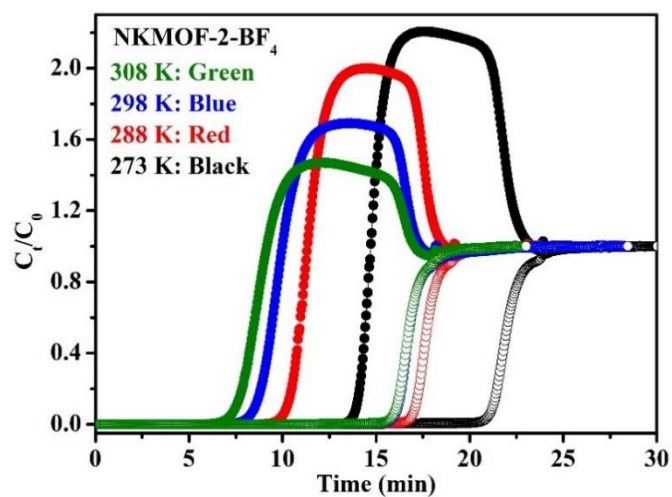

**Fig. S16** The breakthrough curves of  $C_2H_2/CO_2$  ( $v/v = 2/1$ ) with He as carrier gas for NKMOF-2-BF<sub>4</sub> at 273 K, 288 K, 298 K and 308 K.

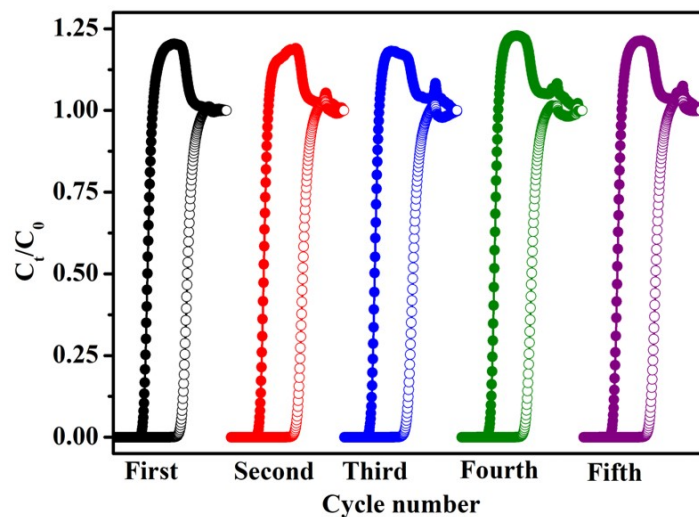

**Fig. S17** The cyclic breakthrough curves of NKMOF-2-Cl in a fixed bed under the flow ( $10 \text{ cm}^3/\text{min}$ ) of  $\text{C}_2\text{H}_2/\text{CO}_2/\text{He}$  (10/10/80, v/v/v).

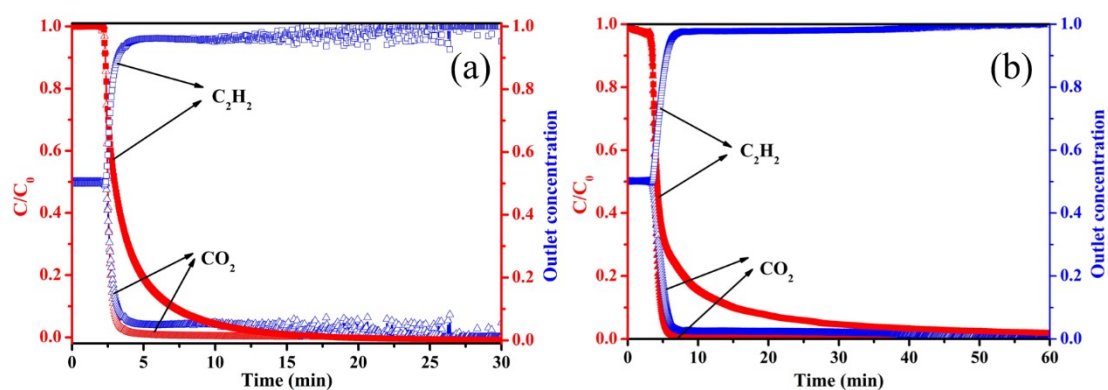

**Fig. S18** The breakthrough desorption curves for NKMOF-2-Cl (a) and NKMOF-2-BF<sub>4</sub> (b)

**Table S8** The lattice parameters of **NKMOF-2-Cl** and **NKMOF-2-BF<sub>4</sub>** from both DFT and experimental results.

|                            | DFT Results       |                               | Experimental Results |                               |
|----------------------------|-------------------|-------------------------------|----------------------|-------------------------------|
|                            | <b>NKMOF-2-Cl</b> | <b>NKMOF-2-BF<sub>4</sub></b> | <b>NKMOF-2-Cl</b>    | <b>NKMOF-2-BF<sub>4</sub></b> |
| <i>a</i> (Å)               | 13.19             | 13.38                         | 13.1098(3)           | 13.2703(4)                    |
| <i>b</i> (Å)               | 26.23             | 26.16                         | 25.6755(4)           | 25.7082(7)                    |
| <i>c</i> (Å)               | 10.07             | 9.86                          | 9.7704(3)            | 9.7839(9)                     |
| <i>β</i> (°)               | 94.03             | 92.07                         | 95.186(3)            | 92.398(6)                     |
| <i>V</i> (Å <sup>3</sup> ) | 3476.34           | 3448.78                       | 3275.26(14)          | 3334.9(3)                     |

**Table S9** The adsorption energies for CO<sub>2</sub> of the four primary adsorption sites in **NKMOF-2-BF<sub>4</sub>** and **NKMOF-2-Cl**.

| Adsorption Site | Adsorption energy (kJ/mol)    |                   |
|-----------------|-------------------------------|-------------------|
|                 | <b>NKMOF-2-BF<sub>4</sub></b> | <b>NKMOF-2-Cl</b> |
| I               | -60.7                         | -60.3             |
| II              | -61.1                         | -50.9             |
| III             | -60.4                         | -52.4             |
| IV              | -60.3                         | -50.9             |

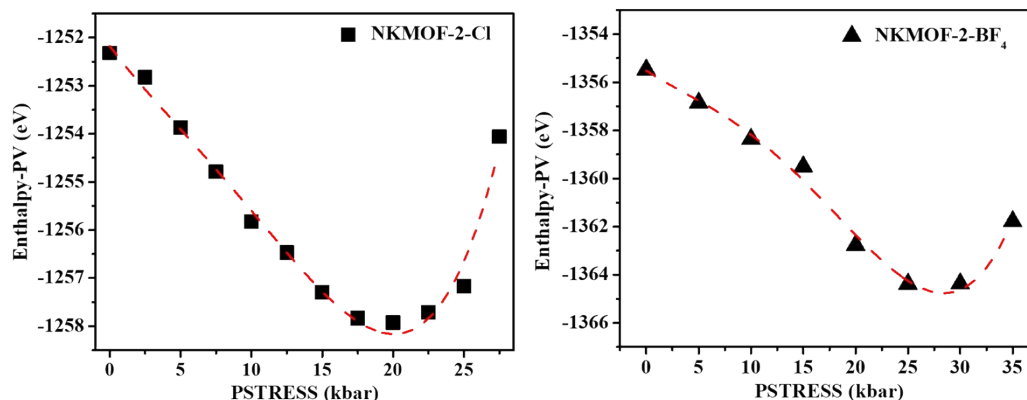

**Fig. S19** The energy changing with increasing pulay stress.

## Supplementary References

1. R. T. Yang, *Gas separation by adsorption processes*, Butterworth-Heinemann, 2013.
2. S. Lee, J. H. Lee and J. Kim, *Korean J. Chem. Eng.*, 2018, **35**, 214-221.
3. H. Zeng, M. Xie, T. Wang, R.-J. Wei, X.-J. Xie, Y. Zhao, W. Lu and D. Li, *Nature*, 2021, **595**, 542-548
4. G. Kresse and J. Hafner, *Phys. Rev. B.*, 1993, **47**, 558-561.
5. G. Kresse and J. Hafner, *Phys. Rev. B.*, 1994, **49**, 14251-14269.
6. G. Kresse and J. Furthmüller, *Phys. Rev. B.*, 1996, **54**, 11169-11186.
7. G. Kresse and J. Furthmüller, *Comput. Mater. Sci.*, 1996, **6**, 15-50.
8. J. Klimeš, D. R. Bowler and A. Michaelides, *J. Phys.: Condens. Matter*, 2009, **22**, 022201.
9. S. L. Dudarev, G. A. Botton, S. Y. Savrasov, C. J. Humphreys and A. P. Sutton, *Phys. Rev. B*, 1998, **57**, 1505-1509.
